# Supplementary material for: GC Insights: The Anthro-Pokécene – environmental impacts echoed in the Pokémon world
Source: Copernicus journal article supplement (doi:10.5194/gc-8-47-2025), 2025-02-11
Supplement: Supplementary file 1 [file gc-8-47-2025-supplement.zip]

## Sheet: Sheet1
Pokémon game generation	Year of release	Pokémon game names included in generation	Primary antagonistic team	Antagonist motive	Example quotes of motive (1)	Example quotes of motive (2)	Hopeful world example (Description)	Hopeful world example (Accompanying image from respective game)	Credit for image	Noted Examples of positive anthropogenic interactions
1	1996	Red/Blue/Yellow	Team Rocket	Poaching	"There are evil people who will use POKEMON for criminal acts. TEAM ROCKET traffics in rare POKEMON. They also abandon POKEMON that they consider not to be popular or useful." - Vermillion City Pokemon Mart	Team Rocket captures Pokémon from around the world. They're important tools for keeping our criminal enterprise going. - Giovanni Rocket Hideout	First games in the franchise only deomnstrated energy production through fossil fuels, and heavily linked it to pollution of the local environment	N/A	N/A	Bicycle path, safari zone
2	1999	Gold/Silver/Crystal	Team Rocket	Poaching	"Team Rocket’s an evil gang that uses Pokémon for their dirty work. They’re supposed to have disbanded three years ago. Anyway, they’re at the well, cutting off SlowpokeTails for sale!" - Kurt Azalea Town	"TEAM ROCKET OATH. Steal POKEMON for profit! Exploit POKEMON for profit! All POKEMON exist for the glory or TEAM ROCKET!" - Basement Mahogany Town	Windturbines introduced in remakes of the 1998 games in 2010.	#VALUE!	bulbapedia.bulbagarden.net	Bicycle path, safari zone (revisited from Red/Blue/Yellow)
3	2003	Ruby/Sapphire/Emerald	Team Magma/Aqua	Human expansion vs. Natural ecosystem	"They have committed many destructive acts in their bid to expand the land. We, Team Aqua, love the sea above all! Team Magma is our sworn enemy!They have committed many destructive acts in their bid to expand the land. We, Team Aqua, love the sea above all! Team Magma is our sworn enemy!" - Archie Meteor Falls	"All life depends on the sea. The sea is everything! Its importance is paramount! That is why we of Team Aqua are committed to expanding the sea. Doing so will result in the emergence of new Pokémon species. We will return the world back to nature for the good of Pokémon." - Archie Mt.Chimney	New Mauville is home to a "power plant" but it is not known what energy source is used.	#VALUE!	bulbapedia.bulbagarden.net	Bicycle path, safari zone
4	2006	Diamond/Pearl/Platinum	Team Galactic	Destroy universe and start again	"Now all will end. And everything will begin. I command that you unleash all your power for me... DialgaD/PalkiaP the mythical Pokémon and the master of timeD/space and dimensionsP! This will bring about the destruction of all things. With everything gone, there will be no fighting and no strife. Can you feel time distorting? Only I can choose to stop itD/Feel the dimensions distorting... Only I …	"My name is Cyrus. I want to put an end to pointless strife and hostility. I am seeking the power to create the ideal world" -Cyrus Celestic Ruins	First appearance of windfarm in the franchise.	#VALUE!	Pokémon Shining Pearl - In game screenshot (L Alcott)	"The Great Marsh" - Safari zone, bicycle path
5	2010	Black/White/Black2/White2	Team Plasma	Stop Pokémon fighting	"That's right! We must liberate the Pokémon! Then, and only then, will humans and Pokémon truly be equals." - Ghetsis Accumula Town	"Never again will Pokémon be made to suffer or be held captive by humans." - N, Pokemon League	Opportunity to go to the Nature Preserve (pictured).	#VALUE!	bulbapedia.bulbagarden.net	"Nature Preserve"
6	2013	X/Y	Team Flare	Population control to reduce strain on resources	"This world will eventually reach the point of no return... Saving the lives of all is impossible. Only the chosen ones will obtain a ticket to tomorrow." - Lysandre Lysandre Labs	"Team Flare will revive the ultimate weapon, eliminate everyone who isn't in our group, and return the world to a beautiful, natural state. Unproductive fools are consuming our future... If nothing changes, the world will become ugly and conflicts will raze the land from end to end. I repeat. We will use the ultimate weapon and wipe the slate clean." - Lysandre Anistar City	"The Kalos Power Plant is the main power source for Lumiose City. It… receives solar radiation energy from the sun, which are the converted to electricity…" https://bulbapedia.bulbagarden.net/wiki/Kalos_Power_Plant	N/A	N/A	"Pokémon Village"
7	2016	Sun/Moon/UltraSun/UltraMoon	Team Skull	No obvious environmental motive	N/A	N/A	Geothermal powerplant	#VALUE!	bulbapedia.bulbagarden.net	Poké Pelago - a group of uninhabited islands in Alola reserved for the pleasure of Pokémon.
8	2019	Sword/Shield	Team Yell/Chairman Rose	Develop an unlimited energy resource	"Must I explain myself? From your perspective, I suppose it must seem that I am doing something terrible. I don't expect you to understand. But I must provide the Galar region with limitless energy to ensure everlasting prosperity. It is my purpose, my duty, my destiny!" - Rose Energy Plant	"Look at the Galar region stretched out before us. And know that the energy required to keep this brilliant, glittering world alive will be exhausted a millennium from now! The people of Galar today will no longer even exist. What Galar wants today hardly matters!" "The future is more important than just one day! We must act as quickly as we possibly can! We must take action in order to avert tra…	Fictional energy source referenced throughout the game, but heavy links to renewable clean energy throughout. (See antagonist motive quotes)	N/A	N/A	"The Wild Area" - A large undeveloped area that dominates a large proportion of the games traversal between locations.
9	2022	Scarlet/Violet	Team Star/Professor Sada/Turo	Diversify ecosystems with non-native species	"...a world in which ancient Pokémon might live alongside present-day Pokémon in harmony...Their very existence brings destruction to the ecological balance of this current age...The original professor would say that such destruction is a natural part of life...the rich and varied ecosystem of Paldea will be trampled beneath their coming." - Professor Turo/Sada Zero Lab	N/A	Wind turbines found throughout the videogame landscape	#VALUE!	Pokémon Scarlet- In game screenshot (L Alcott)	Game mechanics changed here to allow for a more open-world design. This highlighted larger, more open regions for the player to navigate as opposed to smaller interconnected routes between urban centers
