# Supplementary material for: GC Insights: The Anthro-Pokécene – environmental impacts echoed in the Pokémon world
Source: Copernicus journal article supplement (doi:10.5194/gc-8-47-2025), 2025-02-11
Supplement: Supplementary file 1 [file gc-8-47-2025-supplement.zip]

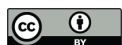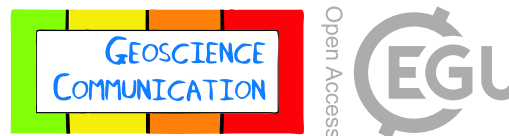

## *Supplement of*

# **GC Insights: The *Anthro-Pokécene* – environmental impacts echoed in the Pokémon world**

**Lewis J. Alcott and Taylor Maavara**

*Correspondence to:* Lewis J. Alcott ([lewis.alcott@bristol.ac.uk](mailto:lewis.alcott@bristol.ac.uk))

- [gc-8-47-2025-supplement-title-page.pdf](#)
- [Quotes.xlsx](#)

The copyright of individual parts of the supplement might differ from the article licence.
